# Supplementary material for: Impact of an Antibiotic Stewardship Program on the Incidence of Resistant Escherichia coli: A Quasi-Experimental Study
Source: Antibiotics (Basel). 2021 Feb 10;10(2):179. doi: 10.3390/antibiotics10020179 (PMC7916635; doi:10.3390/antibiotics10020179)
Supplement: Supplementary file 1 [file antibiotics-10-00179-s001.xlsx]

## Sheet: Sheet1
Appendix Table 1 - Quarterly use of antibiotics in the hospital by DDD/100 days of admission.
	Q1 - 2013	Q2 - 2013	Q3 - 2013	Q4 - 2013	Q1 - 2014	Q2 - 2014	Q3 - 2014	Q4 - 2014	Q1 - 2015	Q2 - 2015	Q3 - 2015	Q4 - 2015	Q1 - 2016	Q2 - 2016	Q3 - 2016	Q4 - 2016	Q1 - 2017	Q2 - 2017	Q3 - 2017	Q4 - 2017	Q1 - 2018	Q2 - 2018	Q3 - 2018	Q4 - 2018
All antibiotics	82.1	73.8	78.6	73.9	80.3	72.5	76.1	75	78.8	74.8	76.1	72.6	71	64.9	70.4	67.5	64.5	54.5	51.4	49.9	52.1	48.6	52.9	50.5
Tetracyclines	5.1	3.2	4.6	4.3	4.9	4.4	4.2	4.5	6.1	5	5.6	5.7	6.3	4.4	5.6	5.6	5.2	4.7	4.4	3.9	4.6	4	5.1	4.4
Penicillins ext spect	11.4	11.4	12	11.4	6.2	5.5	5.4	6	5.2	4.4	5.8	6	6.1	5.3	6.7	5.2	5.5	3.3	2.4	2.5	2.5	2.3	2.6	2.2
Amoxicillin/clavulanate	25.8	22.2	25.1	23	17.2	14.9	15.3	15.2	15.4	15.9	13.1	12.9	12	11.4	11.9	12.1	10.3	7.6	6.2	5.9	6.1	5.6	6.1	5.5
Piperacillin/tazobactam	3.1	3.5	2.9	2.8	3.1	3	2.6	3.5	2.8	2.1	2.1	1.6	1.9	2.1	2.1	2.2	1.6	1.9	1.7	2	2.4	1.5	2	2
1st generation cephalosporins	0	0.1	0.1	0.1	0.1	0.1	0.2	0.1	0.2	0.6	1.3	1.2	1.4	1.8	1.5	1.1	1.7	2.2	2.8	2.5	3.1	2.6	3.8	3.4
2nd generation cephalosporins	11.8	10.9	11.6	10.9	12.1	10.5	12.2	10.7	10	11.7	11.6	12.9	10.8	10.2	9.6	10.2	9.1	7.2	6.8	5.9	5.2	5.3	5.6	5
3rd generation cephalosporins	8.9	7.4	7.1	7	7.2	7.1	7	6.8	8.1	8.2	7.9	7.4	8.2	7.7	7.5	8	8.6	8.7	8	7.7	8.8	8.1	7.9	8.7
Carbapenems	2.1	1.9	2.3	2.1	1.5	1.4	1.6	1.6	1.6	1.2	1.4	1	1.1	1.2	1	0.9	1.2	1.1	1.3	1.3	1.2	1.7	1.5	1.7
Trimethoprim/sulfamethoxazole	0.5	0.3	0.4	0.6	0.7	0.6	0.6	0.5	0.5	0.5	0.6	0.6	0.5	0.6	0.6	0.7	0.9	0.5	0.8	0.7	0.5	0.6	0.5	0.9
Macrolides	0.9	0.8	0.7	0.6	0.9	0.6	0.5	0.6	0.8	0.7	0.6	0.3	0.4	0.3	0.2	0.4	0.3	0.3	0.2	0.2	0.2	0.1	0.2	0.3
Clindamycin	1.6	1.9	1.5	1.7	2.2	2.1	2.5	1.3	1.4	1.8	1.9	2.2	1.6	1.9	1.9	1.5	1.3	1.3	1	1.2	1.1	1.2	1	1
Quiniolones	11.3	11.2	11.6	11.4	10.2	9.7	11.2	10.7	9.3	9.1	9.6	8.7	7.1	7.1	7.9	6.9	6.4	4.9	5.6	4.9	5.1	4.8	5.1	4.8
Aminoglycosides	2.4	2.3	2.5	2.3	2.3	2.3	2.6	1.8	1.8	2	2.2	1.8	1.4	1.6	2.1	1.5	1.6	1.5	1.4	1.8	1.5	1.2	1.8	1.6
Glycopeptides	1.6	1.4	1.5	1.4	1.5	1.5	1.8	1.6	1.7	1.5	1.8	1.2	1.7	1.7	1.6	1.6	1.4	1.5	1.4	1.6	1.2	1.3	1.3	1.3
Colistin	1.3	1	0.8	0.6	0.3	0.2	0.2	0.2	0.3	0.1	0.2	0.1	0.1	0.1	0.2	0.1	0.3	0.1	0	0.1	0.1	0.1	0.1	0.1
Metronidazole	2	2.3	2.2	2.2	3.5	3.7	3.2	3.3	3.3	4.1	4.1	3.4	3.6	3.2	3.1	3.6	3.7	3.2	3.3	3.1	3	3.4	3.4	3
